# Supplementary material
Source: ML conference proceedings conference paper supplement (https://proceedings.neurips.cc/paper_files/paper/2022/hash/4ebf0617b32da2cd083c3b17c7285cce-Abstract.html)
Supplement: Supplementary file 1 [file 4ebf0617b32da2cd083c3b17c7285cce-Supplemental-Conference.zip]

Archive with 6 entries (5 files):
- supplement/
- __MACOSX/._supplement
- supplement/.DS_Store
- __MACOSX/supplement/._.DS_Store
- supplement/appendix.pdf
- __MACOSX/supplement/._appendix.pdf
